# Supplementary material for: Comprehensive Evaluation of Models for Ammonia Binding to the Oxygen Evolving Complex of Photosystem II
Source: PubMed Central journal article supplement (PMC10875651; doi:10.1021/acs.jpcb.3c06304), 2024-02-01
Supplement: jp3c06304_si_001.pdf [file jp3c06304_si_001.pdf]

# Supporting information

for

## Comprehensive Evaluation of Models for Ammonia Binding to the Oxygen Evolving Complex of Photosystem II

Maria Drosou,<sup>a,b,\*</sup> Dimitrios A. Pantazis<sup>a,\*</sup>

<sup>a</sup> Max-Planck-Institut für Kohlenforschung Kaiser-Wilhelm-Platz 1, 45470, Mülheim an der Ruhr, Germany

<sup>b</sup> Inorganic Chemistry Laboratory, National and Kapodistrian University of Athens, Panepistimiopolis, Zografou 15771, Greece

E-mail: [drosou@kofo.mpg.de](mailto:drosou@kofo.mpg.de), [dimitrios.pantazis@kofo.mpg.de](mailto:dimitrios.pantazis@kofo.mpg.de)

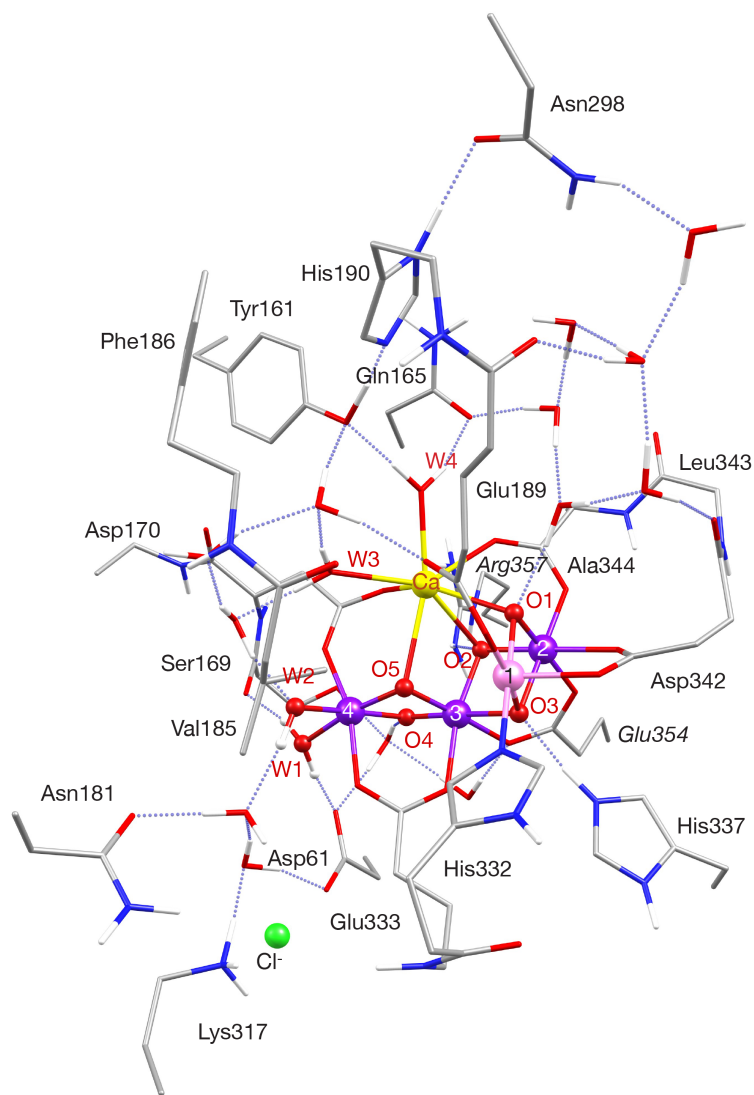

**Figure S1.** Complete computational model for the  $S_2$  state of the OEC. Mn(III) ions are indicated in pink, Mn(IV) in dark purple, Ca in yellow, N in blue, O in red and Cl in green. Hydrogen atoms connected to carbon atoms are omitted for clarity. All amino-acid residues belong to the D1 subunit, except from Arg357 and Glu354 (shown in *italics*), which belong to the CP43 subunit.

**Table S1.** Structural parameters of BP86/ZORA-TZVP optimized S<sub>2</sub>-state structures with various NH<sub>3</sub> binding sites. The corresponding core structures are shown in Figures 4–6 of the manuscript.

|                                  | Mn1-<br>Mn2 | Mn1-<br>Mn3 | Mn2-<br>Mn3 | Mn3-<br>Mn4 | Mn <sup>a</sup> -<br>NHx | Mn1-<br>N(His) | Mn3-<br>O5 | Mn <sup>b</sup> -<br>O5 | Mn4-<br>O(W1) | Mn4-<br>O(W2) |
|----------------------------------|-------------|-------------|-------------|-------------|--------------------------|----------------|------------|-------------------------|---------------|---------------|
| <b>S<sub>2</sub></b>             | 2.765       | 3.386       | 2.814       | 2.768       | -                        | 2.022          | 1.846      | 1.881                   | 2.032         | 1.862         |
| <b>S<sub>2</sub><sup>H</sup></b> | 2.772       | 3.373       | 2.800       | 2.755       | -                        | 2.016          | 1.860      | 1.861                   | 2.008         | 2.039         |
| <b>A1</b>                        | 2.751       | 3.618       | 2.901       | 3.023       | 1.932                    | 2.041          | -          | 1.803                   | 1.957         | 2.231         |
| <b>A2</b>                        | 2.797       | 3.565       | 2.833       | 2.866       | 1.885                    | 2.041          | -          | 2.139                   | 2.002         | 2.066         |
| <b>A3</b>                        | 2.765       | 3.362       | 2.850       | 2.758       | 1.881                    | 2.021          | -          | -                       | 2.046         | 2.068         |
| <b>A4</b>                        | 2.757       | 3.412       | 2.830       | 2.903       | 2.005                    | 2.021          | -          | -                       | 1.968         | 1.850         |
| <b>A5</b>                        | 2.797       | 3.426       | 2.825       | 2.714       | 1.815                    | 2.056          | -          | -                       | 2.112         | 2.078         |
| <b>A6</b>                        | 2.764       | 3.382       | 2.813       | 2.804       | 1.924                    | 2.031          | -          | -                       | 2.071         | 1.867         |
| <b>A7</b>                        | 2.770       | 3.374       | 2.798       | 2.793       | 1.914                    | 2.024          | -          | -                       | 2.044         | 2.039         |
| <b>A8</b>                        | 2.770       | 3.271       | 2.835       | 2.695       | 1.879                    | 2.033          | -          | -                       | 2.198         | 1.890         |
| <b>A9</b>                        | 2.771       | 3.300       | 2.812       | 2.683       | 1.843                    | 2.029          | -          | -                       | 2.161         | 2.069         |
| <b>A10</b>                       | 2.768       | 3.387       | 2.809       | 2.892       | 2.009                    | 2.009          | -          | -                       | 1.946         | 2.015         |
| <b>B1</b>                        | 2.766       | 3.350       | 2.810       | 2.771       | 2.061                    | 2.025          | 1.832      | 1.917                   | -             | 1.869         |
| <b>B2</b>                        | 2.742       | 2.923       | 2.782       | 3.112       | 2.182                    | 2.055          | 1.888      | 1.884                   | -             | 1.866         |
| <b>B3</b>                        | 2.773       | 3.342       | 2.799       | 2.759       | 2.059                    | 2.018          | 1.848      | 1.891                   | -             | 2.039         |
| <b>B4</b>                        | 2.745       | 2.907       | 2.770       | 3.150       | 2.167                    | 2.050          | 1.880      | 1.883                   | -             | 2.035         |
| <b>C1</b>                        | 2.766       | 3.360       | 2.807       | 2.773       | 2.056                    | 2.025          | 1.812      | 1.985                   | 1.814         | -             |
| <b>C2</b>                        | 2.769       | 3.391       | 2.801       | 2.748       | 2.060                    | 2.017          | 1.862      | 1.859                   | 1.997         | -             |
| <b>C3</b>                        | 2.745       | 2.909       | 2.768       | 3.118       | 2.062                    | 2.052          | 1.884      | 1.886                   | 2.114         | -             |
| <b>D1</b>                        | 2.748       | 3.118       | 2.835       | 3.205       | 2.077                    | 2.057          | 2.254      | 1.774                   | 2.155         | 1.786         |
| <b>D2</b>                        | 2.787       | 3.595       | 2.854       | 2.882       | 2.050                    | 2.062          | 1.858      | 1.857                   | -             | 2.280         |
| <b>D3</b>                        | 2.747       | 3.147       | 2.843       | 3.276       | 2.004                    | 2.057          | 2.263      | 1.785                   | 1.895         | 1.958         |
| <b>D4</b>                        | 2.786       | 3.533       | 2.826       | 2.830       | 2.043                    | 2.064          | 1.852      | 1.879                   | -             | 1.871         |
| <b>D5</b>                        | 2.777       | 3.154       | 2.783       | 3.260       | 1.985                    | 2.025          | 1.898      | 2.208                   | 2.091         | 1.888         |
| <b>D6</b>                        | 2.749       | 3.193       | 2.831       | 3.232       | 2.030                    | 2.051          | 2.210      | 1.873                   | 2.112         | 1.861         |
| <b>D7</b>                        | 2.757       | 3.755       | 2.917       | 2.959       | 2.014                    | 2.043          | 1.958      | 1.915                   | -             | 2.072         |
| <b>D8</b>                        | 2.747       | 3.096       | 2.819       | 3.287       | 1.981                    | 2.056          | 2.230      | 1.779                   | 1.940         | 2.125         |
| <b>E1</b>                        | 2.798       | 3.427       | 2.829       | 2.805       | 2.415                    | 2.082          | 1.789      | 1.953                   | 1.834         | 1.857         |
| <b>E2</b>                        | 2.857       | 3.548       | 2.842       | 2.803       | 2.018                    | 2.359          | 1.859      | 1.848                   | 2.001         | 1.872         |
| <b>E3</b>                        | 2.804       | 3.410       | 2.813       | 2.762       | 2.430                    | 2.065          | 1.847      | 1.827                   | 1.995         | 2.062         |
| <b>E4</b>                        | 2.783       | 3.572       | 2.853       | 2.789       | 1.980                    | 2.066          | 1.843      | 1.875                   | 1.975         | 2.072         |

<sup>a</sup>Mn4 ion in binding modes A–D and Mn1 in mode E.

<sup>b</sup>Mn1 ion for closed-cubane structures and Mn4 ion for open-cubane structures.

**Table S2.** Calculated Mulliken Mn spin populations for the optimized S<sub>2</sub> and S<sub>2</sub>-NH<sub>3</sub> models calculated with broken-symmetry (BS) TPSSh using the lowest energy BS determinant. Very similar spin populations are computed with BP86 and with TPSSh using the high-spin determinant.

|                                  | Mn1   | Mn2   | Mn3   | Mn4   |
|----------------------------------|-------|-------|-------|-------|
| <b>S<sub>2</sub></b>             | 3.90  | -2.96 | -2.90 | 2.91  |
| <b>S<sub>2</sub><sup>H</sup></b> | 3.89  | -2.96 | -2.93 | 2.92  |
| <b>A1</b>                        | 2.96  | 2.99  | 2.79  | -3.99 |
| <b>A2</b>                        | -3.89 | 2.94  | 3.12  | 3.10  |
| <b>A3</b>                        | -3.88 | 2.97  | 2.99  | 3.02  |
| <b>A4</b>                        | 3.88  | -2.98 | -2.89 | 2.97  |
| <b>A5</b>                        | 3.92  | -2.94 | -2.84 | 2.73  |
| <b>A6</b>                        | -3.90 | 2.95  | 2.99  | 3.02  |
| <b>A7</b>                        | -3.88 | 2.95  | 3.03  | 3.03  |
| <b>A8</b>                        | 3.91  | -2.92 | -2.75 | 2.79  |
| <b>A9</b>                        | 3.90  | -2.94 | -2.80 | 2.70  |
| <b>A10</b>                       | 3.86  | -2.97 | -2.93 | 2.98  |
| <b>B1</b>                        | 3.94  | -2.97 | -2.92 | 2.96  |
| <b>B2</b>                        | 3.03  | 2.93  | 2.96  | 3.84  |
| <b>B3</b>                        | 3.89  | -2.96 | -2.93 | 2.95  |
| <b>B4</b>                        | 2.99  | 2.93  | 2.99  | 3.90  |
| <b>C1</b>                        | 3.90  | -2.94 | -2.89 | 2.84  |
| <b>C2</b>                        | 3.89  | -2.96 | -2.92 | 2.94  |
| <b>C3</b>                        | 2.97  | 2.93  | 2.87  | -3.90 |
| <b>D1</b>                        | 2.87  | 2.91  | -3.84 | 2.79  |
| <b>D2</b>                        | 2.91  | 2.96  | 2.78  | -3.95 |
| <b>D3</b>                        | 2.88  | 2.90  | -3.83 | 2.92  |
| <b>D4</b>                        | 3.90  | -2.93 | -2.93 | 2.95  |
| <b>D5</b>                        | 3.88  | -2.90 | 2.95  | -2.89 |
| <b>D6</b>                        | 2.98  | 2.90  | -3.84 | 2.86  |
| <b>D7</b>                        | 2.99  | 2.99  | 3.89  | -2.81 |
| <b>D8</b>                        | 2.88  | 2.91  | -3.82 | 2.77  |
| <b>E1</b>                        | 3.92  | -2.93 | -2.83 | 2.87  |
| <b>E2</b>                        | 3.90  | -2.88 | -2.93 | 2.91  |
| <b>E3</b>                        | 3.92  | -2.95 | -2.93 | 2.90  |
| <b>E4</b>                        | 2.97  | -2.96 | -2.81 | 3.91  |

**Table S3.** Relative energies (kcal mol<sup>-1</sup>) of BP86 optimized S<sub>2</sub>-state structures with various NH<sub>3</sub> binding sites calculated with BP86, TPSSh using the high-spin determinant and broken-symmetry (BS) TPSSh using the lowest energy BS determinant.

| (O,H) |           | BP86 | TPSSh | BS-TPSSh |
|-------|-----------|------|-------|----------|
| (2,4) | <b>A6</b> | 15.0 | 19.6  | 19.4     |
|       | <b>A9</b> | 24.4 | 26.7  | 25.5     |
|       | <b>B1</b> | 0.0  | 0.0   | 0.0      |
|       | <b>B2</b> | 8.3  | 10.4  | 11.1     |
|       | <b>C1</b> | 1.3  | 6.5   | 6.4      |
| (2,5) | <b>A4</b> | 32.5 | 39.9  | 39.9     |
|       | <b>A7</b> | 20.0 | 21.9  | 21.7     |
|       | <b>B3</b> | 3.5  | 1.3   | 1.4      |
|       | <b>B4</b> | 8.6  | 5.2   | 6.0      |
|       | <b>C2</b> | 0.0  | 0.0   | 0.0      |
|       | <b>C3</b> | 5.1  | 4.6   | 5.1      |
| (3,6) | <b>A5</b> | 23.0 | 27.3  | 26.2     |
|       | <b>D1</b> | 9.8  | 12.5  | 12.2     |
|       | <b>D2</b> | 0.0  | 0.0   | 0.0      |
|       | <b>D3</b> | 10.3 | 13.8  | 12.7     |
|       | <b>D4</b> | 7.0  | 5.9   | 5.1      |
|       | <b>E2</b> | 15.1 | 20.4  | 19.6     |
| (3,7) | <b>A1</b> | 24.1 | 26.8  | 26.4     |
|       | <b>A2</b> | 33.2 | 36.9  | 36.4     |
|       | <b>A3</b> | 34.6 | 45.0  | 45.5     |
|       | <b>D5</b> | 10.9 | 13.4  | 13.7     |
|       | <b>D6</b> | 3.9  | 8.0   | 8.2      |
|       | <b>D7</b> | 0.0  | 0.0   | 0.0      |
|       | <b>D8</b> | 9.1  | 14.1  | 12.8     |
|       | <b>E3</b> | 5.0  | 7.5   | 6.7      |
|       | <b>E4</b> | 9.9  | 16.1  | 13.8     |

**Table S4.** Calculated effective/projected axial ( $A_{\parallel}$ ) and equatorial ( $A_{\perp}$ )  $^{55}\text{Mn}$  hyperfine coupling constants, as well as isotropic ( $a_{\parallel}$ ) and anisotropic ( $a_{\perp}$ ) on-site hyperfine values and spin projection coefficients  $\rho_i$  for each Mn ion,  $\text{Mn}_i$ , of the  $\text{S}_2\text{-NH}_3$  and the  $\text{S}_2$ -state models in the low-spin ( $S = 1/2$ ) configuration.

|            |                                      | Mn1(III) | Mn2(IV) | Mn3(IV) | Mn4(IV) |
|------------|--------------------------------------|----------|---------|---------|---------|
| <b>A4</b>  | $A_{\text{BS},x}$ <sup>a</sup>       | -179     | 402     | 369     | -438    |
|            | $A_{\text{BS},y}$                    | -468     | 415     | 377     | -469    |
|            | $A_{\text{BS},z}$                    | -534     | 440     | 437     | -498    |
|            | $A_{\parallel}$ <sup>b</sup>         | -85      | -199    | -240    | -419    |
|            | $A_{\perp}$ <sup>c</sup>             | -239     | -185    | -205    | -463    |
|            | $\rho_i$                             | 1.07     | -0.76   | -0.92   | 1.61    |
|            | $\alpha_{\text{iso}}$ <sup>d</sup>   | -175     | 249     | 234     | -278    |
|            | $\alpha_{\text{aniso}}$ <sup>e</sup> | -143     | -19     | -38     | -27     |
| <b>A5</b>  | $A_{\text{BS},x}$                    | -265     | 397     | 404     | -450    |
|            | $A_{\text{BS},y}$                    | -579     | 407     | 460     | -524    |
|            | $A_{\text{BS},z}$                    | -605     | 447     | 471     | -542    |
|            | $A_{\parallel}$                      | -229     | -265    | -173    | -210    |
|            | $A_{\perp}$                          | -510     | -238    | -199    | -248    |
|            | $\rho_i$                             | 1.94     | -1.00   | -0.72   | 0.78    |
|            | $\alpha_{\text{iso}}$                | -215     | 247     | 264     | -300    |
|            | $\alpha_{\text{aniso}}$              | -145     | -26     | 37      | -49     |
| <b>A8</b>  | $A_{\text{BS},x}$                    | -154     | 418     | 398     | -427    |
|            | $A_{\text{BS},y}$                    | -454     | 425     | 430     | -525    |
|            | $A_{\text{BS},z}$                    | -491     | 461     | 444     | -539    |
|            | $A_{\parallel}$                      | -133     | -273    | -201    | -209    |
|            | $A_{\perp}$                          | -407     | -250    | -187    | -260    |
|            | $\rho_i$                             | 1.94     | -1.00   | -0.76   | 0.82    |
|            | $\alpha_{\text{iso}}$                | -163     | 258     | 252     | -295    |
|            | $\alpha_{\text{aniso}}$              | -142     | -23     | -18     | -62     |
| <b>A9</b>  | $A_{\text{BS},x}$                    | -172     | 407     | 404     | -446    |
|            | $A_{\text{BS},y}$                    | -464     | 417     | 463     | -525    |
|            | $A_{\text{BS},z}$                    | -522     | 452     | 473     | -549    |
|            | $A_{\parallel}$                      | -151     | -266    | -156    | -177    |
|            | $A_{\perp}$                          | -433     | -242    | -181    | -213    |
|            | $\rho_i$                             | 1.97     | -0.99   | -0.65   | 0.67    |
|            | $\alpha_{\text{iso}}$                | -172     | 253     | 265     | -301    |
|            | $\alpha_{\text{aniso}}$              | -143     | -24     | 38      | -54     |
| <b>A10</b> | $A_{\text{BS},x}$                    | -211     | 393     | 389     | -429    |

|           |                  |      |       |       |       |
|-----------|------------------|------|-------|-------|-------|
|           | $A_{BS,y}$       | -476 | 404   | 400   | -470  |
|           | $A_{BS,z}$       | -579 | 431   | 446   | -495  |
|           | $A_{\parallel}$  | -96  | -210  | -220  | -416  |
|           | $A_{\perp}$      | -238 | -194  | -194  | -468  |
|           | $\rho_i$         | 1.01 | -0.82 | -0.83 | 1.63  |
|           | $\alpha_{iso}$   | -188 | 243   | 244   | -276  |
|           | $\alpha_{aniso}$ | -141 | -19   | -31   | -32   |
| <hr/>     |                  |      |       |       |       |
| <b>B1</b> | $A_{BS,x}$       | -167 | 404   | 369   | -426  |
|           | $A_{BS,y}$       | -463 | 416   | 384   | -466  |
|           | $A_{BS,z}$       | -521 | 447   | 421   | -503  |
|           | $A_{\parallel}$  | -135 | -263  | -221  | -315  |
|           | $A_{\perp}$      | -398 | -241  | -198  | -279  |
|           | $\rho_i$         | 1.82 | -0.99 | -0.89 | 1.06  |
|           | $\alpha_{iso}$   | -171 | 251   | 232   | -276  |
|           | $\alpha_{aniso}$ | -144 | -22   | -27   | -35   |
| <hr/>     |                  |      |       |       |       |
| <b>B3</b> | $A_{BS,x}$       | -176 | 392   | 390   | -424  |
|           | $A_{BS,y}$       | -466 | 405   | 417   | -471  |
|           | $A_{BS,z}$       | -535 | 437   | 449   | -492  |
|           | $A_{\parallel}$  | -131 | -251  | -261  | -320  |
|           | $A_{\perp}$      | -373 | -229  | -234  | -364  |
|           | $\rho_i$         | 1.68 | -0.97 | -0.98 | -0.98 |
|           | $\alpha_{iso}$   | -174 | 244   | 248   | -274  |
|           | $\alpha_{aniso}$ | -144 | -23   | -27   | -34   |
| <hr/>     |                  |      |       |       |       |
| <b>C1</b> | $A_{BS,x}$       | -167 | 406   | 369   | -450  |
|           | $A_{BS,y}$       | -461 | 417   | 378   | -461  |
|           | $A_{BS,z}$       | -521 | 450   | 407   | -498  |
|           | $A_{\parallel}$  | -147 | -262  | -147  | -179  |
|           | $A_{\perp}$      | -434 | -240  | -135  | -164  |
|           | $\rho_i$         | 1.99 | -0.98 | -0.61 | 0.61  |
|           | $\alpha_{iso}$   | -170 | 252   | 228   | -279  |
|           | $\alpha_{aniso}$ | -144 | -23   | -20   | 25    |
| <hr/>     |                  |      |       |       |       |
| <b>C2</b> | $A_{BS,x}$       | -175 | 397   | 390   | -442  |
|           | $A_{BS,y}$       | -463 | 410   | 416   | -476  |
|           | $A_{BS,z}$       | -533 | 441   | 449   | -483  |
|           | $A_{\parallel}$  | -123 | -247  | -264  | -354  |
|           | $A_{\perp}$      | -352 | -226  | -238  | -384  |
|           | $\rho_i$         | 1.59 | -0.94 | -0.99 | 1.35  |
|           | $\alpha_{iso}$   | -174 | 247   | 248   | -277  |

|           |                         |      |       |       |       |
|-----------|-------------------------|------|-------|-------|-------|
|           | $\alpha_{\text{aniso}}$ | -144 | -23   | -27   | -22   |
| <b>D4</b> | $A_{\text{BS},x}$       | -368 | 386   | 349   | -419  |
|           | $A_{\text{BS},y}$       | -679 | 399   | 375   | -453  |
|           | $A_{\text{BS},z}$       | -730 | 437   | 426   | -500  |
|           | $A_{\parallel}$         | -204 | -196  | -252  | -447  |
|           | $A_{\perp}$             | -391 | -177  | -214  | -390  |
|           | $\rho_i$                | 1.25 | -0.76 | -1.00 | 1.51  |
|           | $\alpha_{\text{iso}}$   | -264 | 242   | 228   | -271  |
|           | $\alpha_{\text{aniso}}$ | -150 | -26   | -38   | 38    |
| <b>D5</b> | $A_{\text{BS},x}$       | -311 | 471   | -430  | 397   |
|           | $A_{\text{BS},y}$       | -589 | 481   | -447  | 422   |
|           | $A_{\text{BS},z}$       | -675 | 503   | -509  | 464   |
|           | $A_{\parallel}$         | -203 | -231  | -376  | -258  |
|           | $A_{\perp}$             | -412 | -219  | -324  | -228  |
|           | $\rho_i$                | 1.47 | -0.77 | 1.25  | -0.94 |
|           | $\alpha_{\text{iso}}$   | -234 | 288   | -274  | 254   |
|           | $\alpha_{\text{aniso}}$ | -143 | -16   | 42    | -33   |
| <b>E1</b> | $A_{\text{BS},x}$       | -291 | 408   | 355   | -475  |
|           | $A_{\text{BS},y}$       | -603 | 417   | 362   | -484  |
|           | $A_{\text{BS},z}$       | -624 | 452   | 392   | -503  |
|           | $A_{\parallel}$         | -257 | -267  | -106  | -139  |
|           | $A_{\perp}$             | -542 | -244  | -97   | -132  |
|           | $\rho_i$                | 1.99 | -1.00 | -0.45 | 0.46  |
|           | $\alpha_{\text{iso}}$   | -225 | 252   | 219   | -289  |
|           | $\alpha_{\text{aniso}}$ | -143 | -24   | -20   | 14    |
| <b>E2</b> | $A_{\text{BS},x}$       | -315 | 371   | 362   | -437  |
|           | $A_{\text{BS},y}$       | -556 | 394   | 389   | -473  |
|           | $A_{\text{BS},z}$       | -679 | 428   | 436   | -512  |
|           | $A_{\parallel}$         | -207 | -218  | -256  | -417  |
|           | $A_{\perp}$             | -405 | -195  | -220  | -370  |
|           | $\rho_i$                | 1.47 | -0.86 | -0.99 | 1.37  |
|           | $\alpha_{\text{iso}}$   | -230 | 236   | 235   | -281  |
|           | $\alpha_{\text{aniso}}$ | -135 | -27   | -36   | 34    |
| <b>E3</b> | $A_{\text{BS},x}$       | -287 | 388   | 386   | -439  |
|           | $A_{\text{BS},y}$       | -601 | 399   | 419   | -481  |
|           | $A_{\text{BS},z}$       | -622 | 432   | 452   | -493  |
|           | $A_{\parallel}$         | -197 | -228  | -224  | -343  |



|                                  |                         |      |       |       |      |
|----------------------------------|-------------------------|------|-------|-------|------|
|                                  | $A_{\perp}$             | -421 | -208  | -252  | -381 |
|                                  | $\rho_i$                | 1.55 | -0.89 | -0.98 | 1.32 |
|                                  | $\alpha_{\text{iso}}$   | -224 | 241   | 249   | -280 |
|                                  | $\alpha_{\text{aniso}}$ | -145 | -23   | 29    | -28  |
| <hr/>                            |                         |      |       |       |      |
| <b>S<sub>2</sub></b>             | $A_{\text{BS},x}$       | -165 | 405   | 366   | -437 |
|                                  | $A_{\text{BS},y}$       | -459 | 418   | 385   | -479 |
|                                  | $A_{\text{BS},z}$       | -519 | 449   | 423   | -515 |
|                                  | $A_{\parallel}$         | -131 | -261  | -227  | -287 |
|                                  | $A_{\perp}$             | -387 | -239  | -202  | 326  |
|                                  | $\rho_i$                | 1.78 | -0.98 | -0.91 | 1.11 |
|                                  | $\alpha_{\text{iso}}$   | -170 | 251   | 232   | -283 |
|                                  | $\alpha_{\text{aniso}}$ | -144 | -22   | -28   | -35  |
| <hr/>                            |                         |      |       |       |      |
| <b>S<sub>2</sub><sup>H</sup></b> | $A_{\text{BS},x}$       | -175 | 393   | 386   | -443 |
|                                  | $A_{\text{BS},y}$       | -463 | 407   | 415   | -485 |
|                                  | $A_{\text{BS},z}$       | -534 | 438   | 447   | -494 |
|                                  | $A_{\parallel}$         | -127 | -249  | -262  | -344 |
|                                  | $A_{\perp}$             | -363 | -227  | -235  | -380 |
|                                  | $\rho_i$                | 1.64 | -0.96 | -0.99 | 1.31 |
|                                  | $\alpha_{\text{iso}}$   | -174 | 245   | 247   | -281 |
|                                  | $\alpha_{\text{aniso}}$ | -144 | -22   | -28   | -27  |

<sup>a</sup>  $A_{\text{BS},x}$ ,  $A_{\text{BS},y}$ ,  $A_{\text{BS},z}$  are the components of the hyperfine coupling tensor computed from the BS calculation and following the convention  $|A_{\text{BS},z}| > |A_{\text{BS},y}| > |A_{\text{BS},x}|$ . The effective (observable) HFC components  $-A_x$ ,  $A_y$ ,  $A_z$  of  $\text{Mn}_i$  are derived from:  $A_x = A_{\text{BS},x} \cdot \frac{\langle S_z \rangle_{\text{BS}}}{S_i} \cdot \rho_i \cdot 1.78$ , where  $S_i$  is the site spin of  $\text{Mn}_i$  [2 for Mn(III) and 3/2 for Mn(IV)],  $\langle S_z \rangle_{\text{BS}}$  the total  $M_S$  of the BS wavefunction (1/2 in all models),  $\rho_i$  the spin projection coefficient of  $\text{Mn}_i$ ,<sup>1</sup> and 1.78 is a scaling factor used specifically for comparing the computed <sup>55</sup>Mn hyperfine coupling constants with experimental results (see also Computational Details section in the main text).

<sup>b</sup>  $A_{\parallel}$  is defined as the component of the effective HFC components with the largest difference to  $A_{\text{iso}} = (A_x + A_y + A_z)/3$  (Table 2), and  $A_{\perp}$  the average of those components with the smallest difference to  $A_{\text{iso}}$ .

<sup>c</sup> The on-site hyperfine values  $-a_x$ ,  $a_y$ ,  $a_z$  of  $\text{Mn}_i$  are derived from:  $a_x = A_{\text{BS},x} \cdot \frac{\langle S_z \rangle_{\text{BS}}}{S_i} \cdot 1.78$ , and  $\alpha_{\text{iso}} = (\alpha_x + \alpha_y + \alpha_z)/3$ .

<sup>b</sup>  $\alpha_{\text{aniso}}$  is defined as  $\alpha_{\text{aniso}} = \alpha_{\perp} - \alpha_{\parallel}$ , where  $\alpha_{\parallel}$  the on-site HFC component with the largest difference to  $\alpha_{\text{iso}}$  and  $\alpha_{\perp}$  the average of those components with the smallest difference to  $\alpha_{\text{iso}}$ .

**Table S5.** Calculated effective/projected  $^{14}\text{N}$  hyperfine and NQI tensors (in MHz) for the electron–nuclear couplings of the bound  $\text{NH}_x\text{-N}$  and of the His332 imino-N, and  $^{17}\text{O}$  hyperfine tensors (in MHz) of the terminal W1 and W2 ligands and the bridging O5 ligand for the  $\text{S}_2\text{-NH}_3$  and the  $\text{S}_2\text{-state}$  models in the low-spin ( $S = 1/2$ ) configuration.

|           |                                | $^{14}\text{N}$ |        |    | $^{17}\text{O}$ |        |
|-----------|--------------------------------|-----------------|--------|----|-----------------|--------|
|           |                                | $\text{NH}_3$   | His332 | O5 | W2              | W1     |
| <b>A4</b> | $A_{\text{BS},x}$ <sup>a</sup> | 3.64            | -10.76 |    | 15.04           | 2.18   |
|           | $A_{\text{BS},y}$              | 8.12            | -13.25 |    | -15.40          | -3.04  |
|           | $A_{\text{BS},z}$              | 9.96            | -14.26 |    | -62.54          | -15.96 |
|           | $ A_{\text{iso}} ^{\text{b}}$  | 3.06            | 3.42   | -  | 16.66           | 3.80   |
|           | $A_{\text{dip}}^{\text{c}}$    | 0.76            | 0.27   | -  | -8.48           | -2.20  |
|           | $A_{\eta}^{\text{d}}$          | 0.51            | 0.51   | -  | 0.01            | 0.10   |
|           | $ e^2Qq/h $                    | 1.44            | 1.96   |    |                 |        |
|           | $\eta$                         | 0.81            | 0.85   |    |                 |        |
| <b>A5</b> | $A_{\text{BS},x}$              | 6.64            | -2.38  |    | 0.97            | -0.18  |
|           | $A_{\text{BS},y}$              | 14.86           | -6.17  |    | -1.25           | -1.76  |
|           | $A_{\text{BS},z}$              | -16.96          | -6.89  |    | -4.23           | -6.31  |
|           | $ A_{\text{iso}} $             | 6.43            | 2.49   | -  | 0.56            | 0.72   |
|           | $A_{\text{dip}}$               | 1.55            | 0.67   | -  | -0.27           | -0.47  |
|           | $A_{\eta}$                     | 0.34            | 0.26   | -  | 0.13            | 0.45   |
|           | $ e^2Qq/h $                    | 0.8             | 2.23   |    |                 |        |
|           | $\eta$                         | 0.88            | 0.60   |    |                 |        |
| <b>A8</b> | $A_{\text{BS},x}$              | 5.66            | -8.10  |    | 1.09            | -1.93  |
|           | $A_{\text{BS},y}$              | -9.59           | -11.39 |    | -1.22           | -4.41  |
|           | $A_{\text{BS},z}$              | 25.74           | -12.65 |    | -39.93          | -6.27  |
|           | $ A_{\text{iso}} $             | 3.61            | 5.18   | -  | 3.87            | 1.16   |
|           | $A_{\text{dip}}$               | -1.60           | 0.63   | -  | -3.55           | 0.31   |
|           | $A_{\eta}$                     | 0.33            | 0.48   | -  | 0.01            | 0.81   |
|           | $ e^2Qq/h $                    | 0.87            | 2.23   |    |                 |        |
|           | $\eta$                         | 0.97            | 0.50   |    |                 |        |
| <b>A9</b> | $A_{\text{BS},x}$              | -12.35          | -8.82  |    | -0.13           | -1.71  |
|           | $A_{\text{BS},y}$              | 12.91           | -11.89 |    | 1.81            | -3.81  |
|           | $A_{\text{BS},z}$              | 23.75           | -13.04 |    | -3.97           | -6.42  |
|           | $ A_{\text{iso}} $             | 3.59            | 5.55   | -  | 0.44            | 0.89   |
|           | $A_{\text{dip}}$               | -0.81           | 0.60   | -  | -0.22           | -0.27  |
|           | $A_{\eta}$                     | 0.08            | 0.47   | -  | 0.84            | 0.86   |
|           | $ e^2Qq/h $                    | 0.62            | 2.16   |    |                 |        |
|           | $\eta$                         | 0.96            | 0.56   |    |                 |        |

|            |              |        |        |        |        |        |
|------------|--------------|--------|--------|--------|--------|--------|
| <b>A10</b> | $A_{BS,x}$   | 1.53   | -11.81 |        | 0.45   | -2.50  |
|            | $A_{BS,y}$   | 6.51   | -14.00 |        | 1.05   | -30.93 |
|            | $A_{BS,z}$   | 9.12   | -15.04 |        | -1.49  | -30.93 |
|            | $ A_{iso} $  | 2.35   | 3.45   | -      | 0.54   | 8.18   |
|            | $A_{dip}$    | 0.86   | 0.23   | -      | 0.15   | -4.33  |
|            | $A_{\eta}$   | 0.62   | 0.57   | -      | 0.82   | 0.57   |
|            | $ e^2 Qq/h $ | 1.33   | 1.86   |        |        |        |
|            | $\eta$       | 0.80   | 0.82   |        |        |        |
| <hr/>      |              |        |        |        |        |        |
| <b>B1</b>  | $A_{BS,x}$   | -7.73  | -9.65  | 6.62   | 10.71  |        |
|            | $A_{BS,y}$   | -7.90  | -12.54 | 28.15  | -11.25 |        |
|            | $A_{BS,z}$   | -10.23 | -13.69 | -40.78 | -52.28 |        |
|            | $ A_{iso} $  | 3.03   | 5.44   | 8.14   | 4.66   | -      |
|            | $A_{dip}$    | -0.28  | 0.52   | 3.00   | -2.47  | -      |
|            | $A_{\eta}$   | 0.10   | 0.50   | 0.68   | 0.24   | -      |
|            | $ e^2 Qq/h $ | 1.27   | 2.09   |        |        |        |
|            | $\eta$       | 0.77   | 0.71   |        |        |        |
| <hr/>      |              |        |        |        |        |        |
| <b>B3</b>  | $A_{BS,x}$   | -7.54  | -10.34 | -10.28 | 1.41   |        |
|            | $A_{BS,y}$   | -7.57  | -12.97 | 28.88  | 2.46   |        |
|            | $A_{BS,z}$   | -9.87  | -14.04 | -47.07 | -6.01  |        |
|            | $ A_{iso} $  | 3.53   | 5.21   | 10.79  | 1.40   | -      |
|            | $A_{dip}$    | -0.33  | 0.44   | 3.46   | -0.58  | -      |
|            | $A_{\eta}$   | 0.02   | 0.51   | 0.99   | 0.39   | -      |
|            | $ e^2 Qq/h $ | 1.29   | 2.00   |        |        |        |
|            | $\eta$       | 0.91   | 0.79   |        |        |        |
| <hr/>      |              |        |        |        |        |        |
| <b>C1</b>  | $A_{BS,x}$   | -5.88  | -9.46  | 20.12  | 17.00  |        |
|            | $A_{BS,y}$   | -6.10  | -12.43 | 26.68  | -22.23 |        |
|            | $A_{BS,z}$   | -6.21  | -13.54 | -40.98 | -91.64 |        |
|            | $ A_{iso} $  | 1.23   | 5.87   | 11.87  | -      | 8.82   |
|            | $A_{dip}$    | 0.02   | 0.58   | -2.38  | -      | -4.85  |
|            | $A_{\eta}$   | 0.61   | 0.47   | 0.56   | -      | 0.11   |
|            | $ e^2 Qq/h $ | 1.84   | 2.12   |        |        |        |
|            | $\eta$       | 0.30   | 0.70   |        |        |        |
| <hr/>      |              |        |        |        |        |        |
| <b>C2</b>  | $A_{BS,x}$   | -7.78  | -10.31 | -17.19 | 0.98   |        |
|            | $A_{BS,y}$   | -7.97  | -12.96 | 32.91  | -4.03  |        |
|            | $A_{BS,z}$   | -9.03  | -14.01 | -43.88 | -17.53 |        |
|            | $ A_{iso} $  | 3.71   | 4.93   | 12.23  | -      | 3.38   |
|            | $A_{dip}$    | -0.17  | 0.42   | 2.76   | -      | -2.25  |
|            |              |        |        |        |        |        |

|           |             |        |        |         |        |        |
|-----------|-------------|--------|--------|---------|--------|--------|
|           | $A_\eta$    | 0.25   | 0.50   | 0.78    | -      | 0.30   |
|           | $ e^2Qq/h $ | 1.68   | 2.00   |         |        |        |
|           | $\eta$      | 0.34   | 0.79   |         |        |        |
| <b>D4</b> | $A_{BS,x}$  | -8.17  | -0.24  | 4.85    | 10.47  | -41.35 |
|           | $A_{BS,y}$  | -8.41  | -4.11  | -26.54  | -11.25 | -44.09 |
|           | $A_{BS,z}$  | -11.09 | -4.73  | 27.70   | -51.66 | -76.52 |
|           | $ A_{iso} $ | 4.64   | 0.95   | 8.22    | 12.29  | 16.84  |
|           | $A_{dip}$   | -0.47  | 0.43   | 3.10    | -6.84  | -3.51  |
|           | $A_\eta$    | 0.12   | 0.22   | 0.08    | 0.03   | 0.12   |
|           | $ e^2Qq/h $ | 1.23   | 2.23   |         |        |        |
|           | $\eta$      | 0.90   | 0.59   |         |        |        |
| <b>D5</b> | $A_{BS,x}$  | 5.21   | -7.28  | -50.40  | 1.48   | 2.27   |
|           | $A_{BS,y}$  | 5.54   | -10.76 | -94.61  | -1.95  | -10.72 |
|           | $A_{BS,z}$  | 8.33   | -11.44 | -115.06 | -5.70  | 21.23  |
|           | $ A_{iso} $ | 1.99   | 3.60   | 33.89   | 0.95   | 3.56   |
|           | $A_{dip}$   | -0.31  | 0.47   | 7.09    | -0.41  | -1.54  |
|           | $A_\eta$    | 0.17   | 0.27   | 0.56    | 0.18   | 0.86   |
|           | $ e^2Qq/h $ | 0.98   | 2.10   |         |        |        |
|           | $\eta$      | 0.73   | 0.71   |         |        |        |
| <b>E1</b> | $A_{BS,x}$  | 23.73  | 2.06   | 27.36   | 10.69  | 17.70  |
|           | $A_{BS,y}$  | 23.82  | -2.25  | -30.07  | -25.77 | -20.79 |
|           | $A_{BS,z}$  | 35.03  | -2.85  | 36.09   | -67.39 | -67.36 |
|           | $ A_{iso} $ | 13.68  | 1.18   | 4.77    | 5.35   | 5.46   |
|           | $A_{dip}$   | -1.86  | -0.11  | -0.38   | -2.53  | -2.48  |
|           | $A_\eta$    | 0.01   | 0.40   | 0.55    | 0.46   | 0.10   |
|           | $ e^2Qq/h $ | 2.89   | 2.48   |         |        |        |
|           | $\eta$      | 0.31   | 0.47   |         |        |        |
| <b>E2</b> | $A_{BS,x}$  | -5.21  | 25.31  | 0.57    | 10.66  | 3.46   |
|           | $A_{BS,y}$  | -7.26  | 25.82  | -26.76  | -10.80 | -5.85  |
|           | $A_{BS,z}$  | -8.22  | 32.01  | 38.26   | -51.07 | 6.26   |
|           | $ A_{iso} $ | 3.15   | 10.21  | 8.60    | 11.06  | 2.37   |
|           | $A_{dip}$   | 0.39   | -0.79  | 4.19    | -5.51  | 0.47   |
|           | $A_\eta$    | 0.57   | 0.12   | 0.54    | 0.01   | 0.20   |
|           | $ e^2Qq/h $ | 1.73   | 3.37   |         |        |        |
|           | $\eta$      | 0.72   | 0.18   |         |        |        |
| <b>E3</b> | $A_{BS,x}$  | 23.85  | 0.30   | -14.51  | -1.35  | -1.55  |
|           | $A_{BS,y}$  | 23.94  | -3.69  | -36.67  | -2.54  | 2.29   |

|                                  |             |       |        |        |        |        |
|----------------------------------|-------------|-------|--------|--------|--------|--------|
|                                  | $A_{BS,z}$  | 34.10 | -4.24  | 39.40  | -7.89  | -13.57 |
|                                  | $ A_{iso} $ | 10.56 | 1.06   | 11.54  | 1.73   | 2.55   |
|                                  | $A_{dip}$   | -1.32 | 0.47   | 3.00   | -0.87  | -1.70  |
|                                  | $A_\eta$    | 0.01  | 0.22   | 0.17   | 0.30   | 0.10   |
|                                  | $ e^2Qq/h $ | 2.94  | 2.27   |        |        |        |
|                                  | $\eta$      | 0.19  | 0.61   |        |        |        |
| <hr/>                            |             |       |        |        |        |        |
| <b>S<sub>2</sub></b>             | $A_{BS,x}$  |       | -9.80  | 2.36   | 9.93   | 1.37   |
|                                  | $A_{BS,y}$  |       | -12.66 | 36.65  | -10.16 | 3.71   |
|                                  | $A_{BS,z}$  |       | -13.81 | -37.39 | -56.84 | -5.09  |
|                                  | $ A_{iso} $ |       | 5.38   | 8.53   | 9.45   | 1.25   |
|                                  | $A_{dip}$   |       | 0.51   | 3.87   | -5.75  | 0.37   |
|                                  | $A_\eta$    |       | 0.50   | 0.03   | 0.01   | 0.68   |
|                                  | $ e^2Qq/h $ |       | 2.08   |        |        |        |
|                                  | $\eta$      |       | 0.72   |        |        |        |
| <hr/>                            |             |       |        |        |        |        |
| <b>S<sub>2</sub><sup>H</sup></b> | $A_{BS,x}$  |       | -10.48 | -14.56 | -0.17  | 1.34   |
|                                  | $A_{BS,y}$  |       | -13.09 | 35.52  | 0.75   | -2.75  |
|                                  | $A_{BS,z}$  |       | -14.15 | -44.25 | -7.63  | -13.26 |
|                                  | $ A_{iso} $ |       | 5.14   | 12.02  | 1.24   | 2.52   |
|                                  | $A_{dip}$   |       | 0.43   | 3.23   | -1.04  | -2.27  |
|                                  | $A_\eta$    |       | 0.51   | 0.52   | 0.12   | 0.14   |
|                                  | $ e^2Qq/h $ |       | 1.99   |        |        |        |
|                                  | $\eta$      |       | 0.80   |        |        |        |

<sup>a</sup>  $A_{BS,x}$ ,  $A_{BS,y}$ ,  $A_{BS,z}$  are the components of the hyperfine coupling tensor computed from the BS calculation and they follow the convention  $|A_{BS,z}| > |A_{BS,y}| > |A_{BS,x}|$ . The effective (observable) HFC components  $-A_x$ ,  $A_y$ ,  $A_z$  of <sup>14</sup>N or <sup>17</sup>O ligand to  $Mn_i$  are derived from:  $A_x = A_{BS,x} \cdot \frac{\langle S_z \rangle_{BS}}{S_i} \cdot \rho_i$ , where  $S_i$  is the site spin of  $Mn_i$  [2 for Mn(III) and 3/2 for Mn(IV)],  $\langle S_z \rangle_{BS}$  the total  $M_S$  of the BS wavefunction (1/2 in all models), and  $\rho_i$  the spin projection coefficient of  $Mn_i$ . For a bridging ligand coordinated to  $Mn_j$  and  $Mn_k$ , such as  $NH_x$  in models A and O5, the effective HFC components are derived from  $A_x = \frac{A_{BS,x}}{2} \cdot (\frac{\langle S_z \rangle_{BS}}{S_j} \cdot |\rho_j| + \frac{\langle S_z \rangle_{BS}}{S_k} \cdot |\rho_k|)$ , where  $S_j$  and  $\rho_j$  are the site spin and the spin projection coefficient, respectively, of  $Mn_j$ .<sup>1-3</sup>

<sup>b</sup>  $|A_{iso}|$  is defined as the average of the principal components of the effective hyperfine tensor:  $|A_{iso}| = (|A_x| + |A_y| + |A_z|) / 3$ .

<sup>c</sup>  $A_{dip}$  is defined as  $A_{dip} = (T_1 + T_2) / 2 = -T_3 / 2$ , where  $T_1$ ,  $T_2$ , and  $T_3$  represent the three principal components of the hyperfine tensors minus  $A_{iso}$ , i.e.  $|A_x| - |A_{iso}|$ ,  $|A_y| - |A_{iso}|$ , and  $|A_z| - |A_{iso}|$ , respectively, and are labeled such that  $|T_1| \leq |T_2| \leq |T_3|$ .<sup>d</sup> The rhombicity is defined as  $A_\eta = (T_1 - T_2) / T_3$ , respectively.

**Table S6.** Electron affinity (EA) differences between  $S_2$ -NH<sub>3</sub> and the  $S_2$ -state models, i.e.  $\Delta E = EA(S_2) - EA(S_2\text{-NH}_3)$ . Comparisons are made between structures having the same charge, thus models **A5**, **B1**, **C1**, **D4**, and **E2** are compared with  $S_2$  and models **A4**, **A9**, **B3**, **C2**, **D5**, and **E3** are compared with  $S_2^H$ .

|         |           | $\Delta E$ (kcal mol <sup>-1</sup> ) |
|---------|-----------|--------------------------------------|
| $S_2$   | <b>A5</b> | 8.73                                 |
|         | <b>B1</b> | 2.19                                 |
|         | <b>C1</b> | 4.43                                 |
|         | <b>D4</b> | 2.39                                 |
|         | <b>E2</b> | 0.68                                 |
| $S_2^H$ | <b>A4</b> | 0.34                                 |
|         | <b>A9</b> | 9.87                                 |
|         | <b>B3</b> | 1.57                                 |
|         | <b>C2</b> | 1.97                                 |
|         | <b>D5</b> | 3.33                                 |
|         | <b>E3</b> | 2.90                                 |

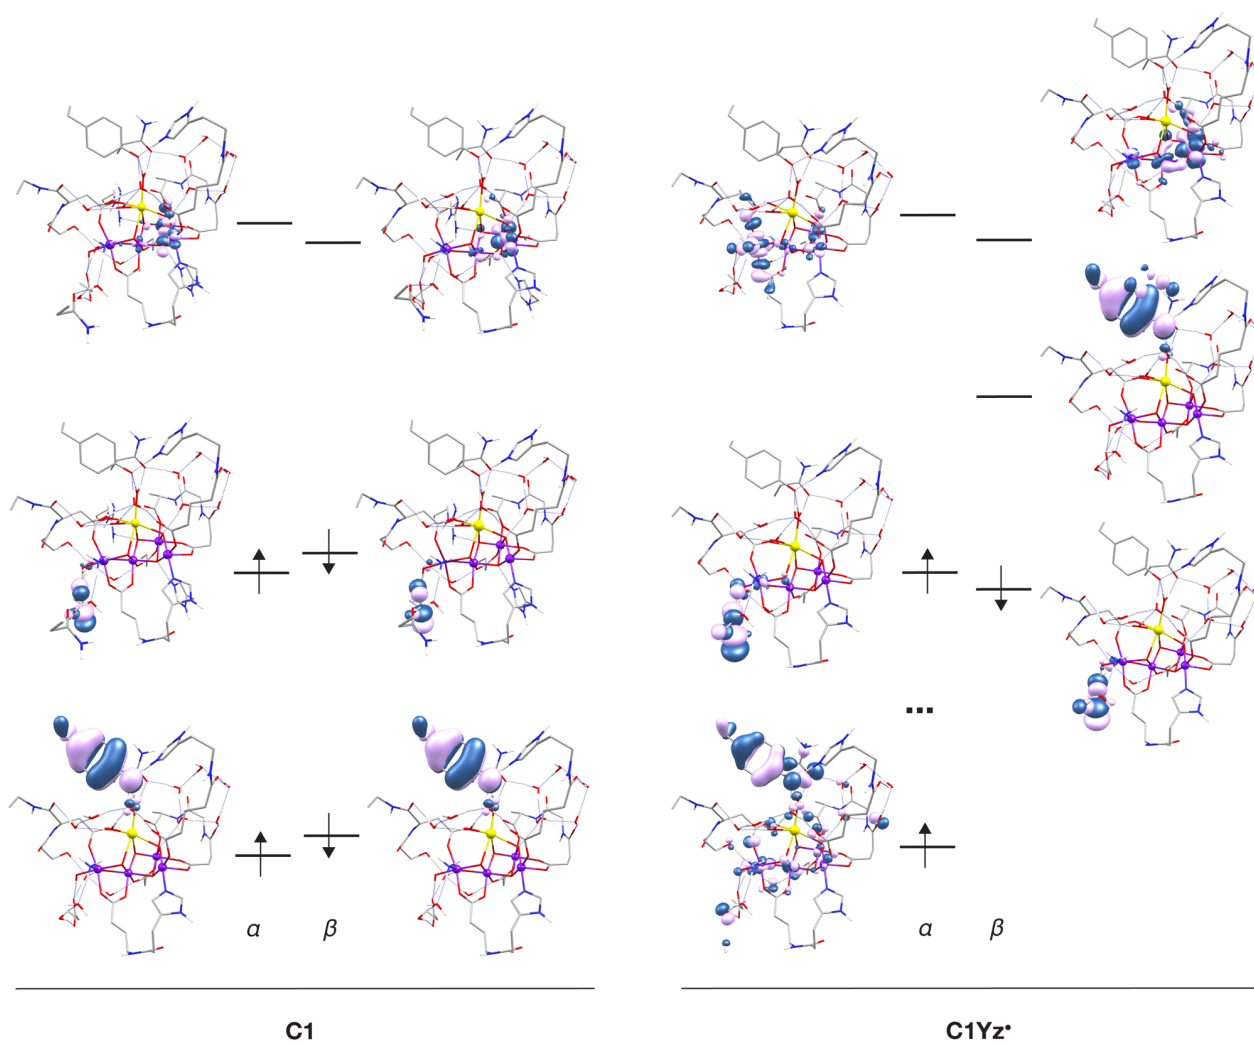

**Figure S2.** Frontier orbitals of model **C1** of the ammonia-bound  $S_2$  state of the OEC (left) and of the oxidized **C1Yz\*** (right); hydrogen atoms are omitted for clarity.

**Table S7.** Comparison of calculated  $^{55}\text{Mn}$  HFCs (MHz) for the model in which ammonia binds on the W1 position (**B1**) between this work, Schraut and Kaupp,<sup>4</sup> and Lohmiller et al.<sup>5</sup>

|              | $A_1$   | $A_2$   | $A_3$   | $A_4$   | $A_1/A_2$ | $A_2/A_3$ | $A_3/A_4$ |
|--------------|---------|---------|---------|---------|-----------|-----------|-----------|
| <b>B1</b>    | 311 [1] | 291 [4] | 248 [2] | 206 [3] | 1.07      | 1.17      | 1.21      |
| <b>Ref 4</b> | 295 [1] | 192 [2] | 160 [4] | 120 [3] | 1.54      | 1.20      | 1.33      |
| <b>Ref 5</b> | 244 [1] | 227 [4] | 215 [2] | 166 [3] | 1.07      | 1.06      | 1.30      |

**Table S8.** Comparison of calculated  $^{14}\text{N}$  HFCs and NQI asymmetry ( $\eta$ ) for **B1** between this work, Schraut and Kaupp,<sup>4</sup> and Lohmiller et al.<sup>5</sup>

|              | $\text{NH}_3$      |        | $\text{His332}$    |        |
|--------------|--------------------|--------|--------------------|--------|
|              | $ A_{\text{iso}} $ | $\eta$ | $ A_{\text{iso}} $ | $\eta$ |
| <b>B1</b>    | 3.03               | 0.77   | 5.44               | 0.71   |
| <b>Ref 4</b> | 3.39               | 0.35   | 5.67               | 0.94   |
| <b>Ref 5</b> | 2.68               | 0.87   | 6.10               | 0.88   |



## Orca Input files

### Broken-Symmetry:

```
! UKS TPSSh RIJCOSX ZORA ZORA-TZVP SARC/J
! Grid5 GridX7 NoFinalGrid TightSCF moread
```

```
%pal nprocs 10 end
%maxcore 3000
```

```
%moinp "filename.gbwn"
```

```
%basis newgto C "ZORA-SVP" end
          newgto H "ZORA-SVP" end
end
```

```
%method intacc 6.0 end
```

```
%scf maxiter 200
      shift shift 0.10 erroff 0.1 end
      FlipSpin 1,2 FinalMs 0.5
end
```

```
*xyzfile 1 14 filename.xyz
```

### Mn hyperfine coupling tensors:

```
! UKS TPSSh RIJCOSX ZORA ZORA-def2-TZVP(-f) SARC/J
! Grid5 GridX7 NoFinalGrid Slowconv TightSCF moread
```

```
%pal nprocs 10 end
%maxcore 15000
```

```
%moinp "filename.gbwn"
```

```
%basis newgto C "ZORA-def2-SVP" end
          newgto H "ZORA-def2-SVP" end
          newgto Mn
```

```
S 1
  1 4331015.6489100000      1.0000000000
S 1
  1 1732406.2595600000      1.0000000000
S 1
  1 692962.5038250000      1.0000000000
S 1
  1 277185.0015300000      1.0000000000
S 1
  1 41550.7698900000      1.0000000000
S 1
  1 9455.9700152000      1.0000000000
S 1
  1 2676.5206482000      1.0000000000
S 1
  1 871.4668753000      1.0000000000
S 1
  1 312.9830642000      1.0000000000
S 1
  1 121.4445405100      1.0000000000
S 1
  1 47.9225988300      1.0000000000
S 1
  1 303.6672316300      1.0000000000
```

```

S 1
 1      93.8814031900      1.0000000000
S 1
 1      14.8794212100      1.0000000000
S 1
 1      6.2865200700     -1.0000000000
S 1
 1      9.4858591300      1.0000000000
S 1
 1      1.5698706200      1.0000000000
S 1
 1      0.6590321400     -1.0000000000
S 1
 1      0.1068629200     -1.0000000000
S 1
 1      0.0392674400     -1.0000000000
P 6
 1 1444.7978182000      0.0032493630
 2  342.0655119700      0.0237346473
 3  109.5840089100      0.1067232634
 4   40.7479881700      0.3007617717
 5   16.1886265700      0.4790147038
 6    6.5484506000      0.2708283465
P 1
 1      25.3570864400     -1.0000000000
P 1
 1      3.4830168800      1.0000000000
P 1
 1      1.3858800900      1.0000000000
P 1
 1      0.5255509500     -1.0000000000
P 1
 1      0.1276500000      1.0000000000
D 4
 1      56.5631891200      0.0192444440
 2      16.2787347100      0.1161060412
 3       5.6964273900      0.3706567953
 4       2.1411147900      0.6570040408
D 1
 1      0.7829180200      1.0000000000
D 1
 1      0.2595231100      1.0000000000
D 1
 1      0.0860000000      1.0000000000
F 1
 1      1.3260000000      1.0000000000
end
end

%method intacc 6.0
  SpecialGridAtoms 25
  SpecialGridIntAcc 11
end

%rel picturechange true end

%scf maxiter 200
  shift shift 0.10 erroff 0.1 end
  CNVSOSCF true SOSCFstart 0.001
end

*xyzfile 1 2 filename.xyz

%eprnmr  nuclei = all Mn { aiso, adip, aorb }
end

```

## N and O hyperfine coupling tensors:

```
! UKS TPSSh RIJCOSX ZORA ZORA-def2-TZVP(-f) SARC/J  
! Grid5 GridX7 NoFinalGrid Slowconv TightSCF moread
```

```
%pal nprocs 10 end  
%maxcore 15000
```

```
%moinp "filename.gbwn"
```

```
%basis
```

```
NewGTO N  
S 1  
1 308293.7601093750 1.0000000000  
S 1  
1 123317.5040437500 1.0000000000  
S 1  
1 49327.0016175000 1.0000000000  
S 1  
1 19730.8006470000 1.0000000000  
S 1  
1 2957.8958745000 1.0000000000  
S 1  
1 673.2213359500 1.0000000000  
S 1  
1 190.6824949400 1.0000000000  
S 1  
1 62.2954419000 1.0000000000  
S 1  
1 22.6541611800 1.0000000000  
S 1  
1 8.9791477400 1.0000000000  
S 1  
1 3.6863002400 1.0000000000  
S 1  
1 0.8466007700 1.0000000000  
S 1  
1 0.3364713400 1.0000000000  
S 1  
1 0.1364765400 1.0000000000  
P 4  
1 49.2003805100 0.0115131336  
2 11.3467905400 0.0785386070  
3 3.4273972400 0.3081978103  
4 1.1785525100 0.7201896814  
P 1  
1 0.4164220500 1.0000000000  
P 1  
1 0.1426082600 1.0000000000  
D 1  
1 1.6540000000 1.0000000000  
D 1  
1 0.4690000000 1.0000000000  
end  
NewGTO O  
S 1  
1 422380.9786093750 1.0000000000  
S 1  
1 168952.3914437500 1.0000000000  
S 1  
1 67580.9565775000 1.0000000000  
S 1  
1 27032.3826310000 1.0000000000  
S 1
```

```

1      4052.3871392000      1.0000000000
S 1
1      922.3272271000      1.0000000000
S 1
1      261.2407098900      1.0000000000
S 1
1      85.3546413500       1.0000000000
S 1
1      31.0350352400       1.0000000000
S 1
1      12.2608607300       1.0000000000
S 1
1      4.9987076000        1.0000000000
S 1
1      1.1703108200        1.0000000000
S 1
1      0.4647474100        1.0000000000
S 1
1      0.1850453600        1.0000000000
P 4
1      63.2749548000        0.0121096626
2      14.6270493800        0.0831734399
3      4.4501223500         0.3200012219
4      1.5275799600         0.7069790865
P 1
1      0.5293511800        1.0000000000
P 1
1      0.1747842100        1.0000000000
D 1
1      2.3140000000        1.0000000000
D 1
1      0.6450000000        1.0000000000
end
end

%method intacc 6.0
      SpecialGridAtoms 8,7
      SpecialGridIntAcc 9,9
end

%rel
      SOCFlags 1,3,3,1
      picturechange true
end

%scf maxiter 200
      shift shift 0.10 erroff 0.1 end
      CNVSOSCF true SOSCFstart 0.001
end

*xyzfile 1 2 filename.xyz

%eprnmr
      nuclei = 10 { aiso, adip, aorb, fgrad }
      nuclei = 11 { aiso, adip, aorb, fgrad }
      nuclei = 12 { aiso, adip, aorb, fgrad }
      nuclei = 83 { aiso, adip, aorb, fgrad }
end

```

## References

- (1) Pantazis, D. A.; Orio, M.; Petrenko, T.; Zein, S.; Bill, E.; Lubitz, W.; Messinger, J.; Neese, F. A New Quantum Chemical Approach to the Magnetic Properties of Oligonuclear Transition-Metal Complexes: Application to a Model for the Tetranuclear Manganese Cluster of Photosystem II. *Chem. Eur. J.* **2009**, *15*, 5108-5123.
- (2) Cox, N.; Ames, W.; Epel, B.; Kulik, L. V.; Rapatskiy, L.; Neese, F.; Messinger, J.; Wieghardt, K.; Lubitz, W. Electronic Structure of a Weakly Antiferromagnetically Coupled Mn<sup>II</sup>Mn<sup>III</sup> Model Relevant to Manganese Proteins: A Combined EPR, <sup>55</sup>Mn-ENDOR, and DFT Study. *Inorg. Chem.* **2011**, *50*, 8238-8251.
- (3) Rapatskiy, L.; Ames, W. M.; Pérez-Navarro, M.; Savitsky, A.; Griese, J. J.; Weyhermüller, T.; Shafaat, H. S.; Högbom, M.; Neese, F.; Pantazis, D. A.; Cox, N. Characterization of Oxygen Bridged Manganese Model Complexes Using Multifrequency <sup>17</sup>O-Hyperfine EPR Spectroscopies and Density Functional Theory. *J. Phys. Chem. B* **2015**, *119*, 13904-13921.
- (4) Schraut, J.; Kaupp, M. On Ammonia Binding to the Oxygen-Evolving Complex of Photosystem II: A Quantum Chemical Study. *Chem. Eur. J.* **2014**, *20*, 7300-7308.
- (5) Lohmiller, T.; Krewald, V.; Navarro, M. P.; Retegan, M.; Rapatskiy, L.; Nowaczyk, M. M.; Boussac, A.; Neese, F.; Lubitz, W.; Pantazis, D. A.; Cox, N. Structure, ligands and substrate coordination of the oxygen-evolving complex of photosystem II in the S<sub>2</sub> state: a combined EPR and DFT study. *Phys. Chem. Chem. Phys.* **2014**, *16*, 11877-11892.
